# Supplementary material for: Interaction of Lherzolite Xenoliths with Basanite is not Isochemical: Evidence from Tumusun Volcano, Baikal Rift Zone
Source: Preprints.org preprint supplement (doi:10.20944/preprints202302.0204.v1), 2023-02-13
Supplement: Supplementary file 1 [file supplementary]

## Sheet: Calc. TE composition
Calculated trace element (in ppm) composition of lherzolite xenoliths (see Figure 7).
	Trace element compositions of primary minerals determined by LA-ICP-MS
Sample	HD6			HD24/2			HD34			HD38			HD58			HD68
Mineral	Ol (n*=5)	Opx (n=2)	Cpx (n=5)	Ol (n=5)	Opx (n=4)	Cpx (n=3)	Ol (n=3)	Opx (n=3)	Cpx (n=3)	Ol (n=3)	Opx (n=3)	Cpx (n=3)	Ol (n=4)	Opx (n=2)	Cpx (n=2)	Ol (n=2)	Opx (n=2)	Cpx (n=2)
Rb	-	-	-	0.0132669	0.0135292	0.0289836	-	-	0.0452457	0.0146672	0.0242133	0.0258391	-	0.0300677	0.0231749	-	-	0.0349058
Ba	0.0380972	0.0117525	0.0596412	0.0716098	0.0231891	0.427556	0.0892174	0.0283302	0.0692449	-	-	-	0.0472147	-	0.193136	0.0420476	0.012925	0.132535
Nb	0.00128864	-	0.115128	0.00169347	0.00959501	0.339342	0.00105186	0.00385436	0.169992	0.00118991	0.00602466	0.267674	0.00166451	-	0.0649173	0.00156348	0.00435895	0.26942
La	0.00211111	0.00404626	1.94531	0.00338729	0.0190205	6.57233	0.0046409	-	1.20848	0.00192795	0.00312101	1.28895	0.00200192	0.0041101	3.30846	0.00238704	0.00103767	0.756555
Ce	0.00187313	0.0186098	5.43493	0.00661684	0.0614711	11.7894	0.00572116	0.0139583	4.10552	0.00361105	0.0139724	4.09626	0.00447043	0.0169457	8.84618	0.00374417	0.0067959	2.69905
Pb	0.110167	0.124549	0.236525	0.182441	0.155775	0.56976	0.161975	0.120545	0.339747	0.190152	0.327413	0.418474	0.129823	0.0850722	0.524614	0.105664	0.0504338	0.263822
Pr	0.000683407	0.00352256	0.877826	-	0.0076044	1.15088	0.00131539	0.00244781	0.807698	0.000365453	0.00286841	0.749037	-	0.00548344	1.30365	-	0.00185788	0.508336
Sr	0.0522573	0.25372	98.5049	0.0920517	0.490371	131.802	0.114096	0.251418	83.4063	0.0358445	0.18104	81.8062	0.11548	0.344725	194.918	0.0634509	0.112648	54.2501
Nd	0.00290563	0.0328367	5.13172	0.00434555	0.0502471	5.12079	0.00557182	0.0332451	5.12886	-	0.0225792	4.48923	0.00260018	0.0329643	6.54182	-	0.0135078	3.13854
Sm	0.0025452	0.0192549	1.97541	-	0.018803	1.4086	-	0.0254113	2.00342	-	0.0205938	1.86386	0.00280852	0.0199245	1.98859	-	0.00954243	1.41417
Zr	0.0338373	1.7629	45.4085	0.0256373	1.13725	24.7227	0.0392213	1.72509	46.0091	0.0364354	1.6569	39.4815	0.0204215	1.46489	34.892	0.0192677	1.05059	25.795
Hf	0.00132443	0.0475705	1.36809	0.00108045	0.0339851	0.803367	0.00172966	0.0452894	1.34541	0.00118527	0.0463632	1.19572	-	0.0433659	1.1455	-	0.0334306	0.891365
Eu	-	0.010677	0.818002	0.000692167	0.0103549	0.628182	0.000699794	0.0120208	0.804551	-	0.0102385	0.738264	-	0.00929684	0.776986	-	0.00980386	0.601918
Ti	39.7021	852.079	4441.21	23.0361	655.772	2801.2	38.2672	920.444	4781.22	31.7786	868.845	4227	27.7524	793.721	4060.33	22.6755	663.125	3063.6
Gd	0.00292222	0.0553055	2.83851	0.00243061	0.0467499	2.16217	0.00478177	0.0630407	3.19807	0.00200491	0.0483565	2.75768	0.00408478	0.0457602	2.75876	-	0.0396566	2.2472
Tb	0.00101306	0.013572	0.545533	0.000458829	0.011946	0.405877	0.00112033	0.0139182	0.576494	0.000690597	0.0140857	0.519611	0.000484367	0.0140862	0.494454	0.000433542	0.0096223	0.423782
Dy	0.00495709	0.126567	3.95435	0.00302888	0.116591	3.0229	0.00643666	0.137641	4.23241	0.00636362	0.142126	3.62468	0.00398499	0.136251	3.41751	0.00316292	0.119597	3.21639
Y	0.0687422	1.07227	22.2387	0.0359269	0.984982	16.5613	0.0801129	1.17555	23.1807	0.0691255	1.17157	22.0843	0.0440718	0.92425	17.9609	0.0347723	0.992075	18.5794
Ho	0.0021467	0.0408464	0.84027	0.00123566	0.0339014	0.629784	0.00267673	0.0385179	0.898811	0.00187963	0.0424656	0.800528	0.000870018	0.0334755	0.69067	0.000907362	0.0341313	0.666621
Er	0.00994636	0.15456	2.48382	0.00719111	0.12532	1.7847	0.0130961	0.157299	2.59209	0.00794867	0.157667	2.3542	0.00527666	0.121623	2.03323	0.00621258	0.148731	2.09118
Tm	0.00284364	0.0318709	0.33687	0.00159773	0.0254561	0.251392	0.00337858	0.0326536	0.363384	0.00245368	0.0295276	0.330086	0.00163147	0.0254552	0.256641	0.00172963	0.0275232	0.280301
Yb	0.0277463	0.273598	2.25454	0.0186294	0.232494	1.63525	0.0281793	0.296938	2.47884	0.0263367	0.282975	2.14049	0.0181648	0.240485	1.60055	0.0174314	0.243175	1.89871
Lu	0.00614433	0.0461674	0.30961	0.00402057	0.038717	0.235521	0.00661943	0.0529386	0.358843	0.00637631	0.0514385	0.31816	0.00331993	0.0352884	0.230183	0.00483849	0.0450969	0.281419
Note: * n - number of analysis (LA-ICP-MS method)
		Whole-rock compositions calculated from modal composition (Table 1) and mineral trace element compositions (this table)						Mix of calculated lherzolite compositions and basanite composition, with basanite proportion (x) defined by difference in Nb abundance between measured and calculated compositions						Mix of compositions of central part of lherzolite xenolith and basanite proportion (x) defined by difference in measured K abundance between margin and center of xenolith
Sample	Basanite	HD6	HD24/2	HD34	HD38	HD58	HD68	HD6	HD24/2	HD34	HD38	HD58	HD68	HD6	HD24/2	HD38
x - basanite proportion in the mix (wt.%)								0.13	0.11	0.17	0.17	0.15	0.13	3.23	1.85	3.23
Rb	49	-	0.0150678	0.00741656	0.0188184	0.0118347	0.00427418	0.0631053	0.0687422	0.0894881	0.102275	0.0875147	0.0692615	1.93498	1.51182	1.21278
Ba	589	0.0359816	0.0964077	0.0721115	-	0.0594995	0.0456984	0.794533	0.741597	1.05864	1.00319	0.969204	0.826872	25.1789	13.9297	15.923
Nb	72	0.022812	0.0410486	0.0294052	0.0467993	0.0119364	0.0350753	0.115538	0.119917	0.15	0.16943	0.12314	0.130567	2.44166	1.44913	1.49864
K	21667	-	-	-	-	-	-	-	-	-	-	-	-	1000	800	600
La	47.5	0.375184	0.728429	0.200907	0.216896	0.562396	0.0943899	0.436357	0.78046	0.280466	0.297798	0.635759	0.157388	2.35454	1.90232	1.25137
Ce	97.1	1.04764	1.31501	0.679705	0.688767	1.50481	0.33456	1.1727	1.42137	0.842341	0.854148	1.65478	0.463341	4.97189	3.76505	2.78929
Pb	3.4	0.137807	0.217078	0.182183	0.26113	0.184894	0.110941	0.142185	0.220802	0.187878	0.266921	0.190145	0.11545	0.244025	0.271751	0.268226
Pr	11.31	0.169551	0.128459	0.133767	0.125847	0.222172	0.0627192	0.184117	0.140847	0.15271	0.14511	0.23964	0.0777193	0.624945	0.424138	0.371298
Sr	1003	18.9786	14.6544	13.7998	13.7103	33.1592	6.71111	20.2703	15.7531	15.4798	15.4186	34.7083	8.04136	53.6633	37.0483	34.4965
Nd	43.8	0.993466	0.578986	0.851874	0.754236	1.11779	0.387757	1.04987	0.626965	0.925236	0.828836	1.18544	0.445848	2.70062	1.70248	1.6813
Sm	9.04	0.38481	0.160016	0.334345	0.315836	0.343539	0.175598	0.396452	0.169919	0.349486	0.331233	0.357501	0.187587	0.721627	0.410417	0.530933
Zr	304	9.14452	3.06118	7.96937	7.0044	6.30481	3.43857	9.53604	3.39418	8.47855	7.52217	6.77433	3.84176	20.104	11.7122	12.8122
Hf	7.27	0.274371	0.0987476	0.232189	0.211265	0.205363	0.117675	0.283734	0.106711	0.244365	0.223648	0.216591	0.127317	0.595753	0.275212	0.364213
Eu	2.63	0.159386	0.0723533	0.135119	0.1256	0.134003	0.0762053	0.162773	0.0752342	0.139524	0.130079	0.138065	0.0796934	0.251653	0.141858	0.198069
Ti	14928	1076.33	513.812	1022.44	932.156	912.062	558.414	1095.55	530.165	1047.44	957.581	935.118	578.212	1823.84	868.59	1267.59
Gd	6.76	0.559074	0.252332	0.54188	0.472772	0.481462	0.285284	0.567779	0.259737	0.553203	0.484286	0.491903	0.294249	0.795156	0.480331	0.667688
Tb	0.92	0.108404	0.048301	0.0984358	0.0904591	0.0877005	0.0546162	0.109589	0.0493088	0.0999767	0.092026	0.0891214	0.0558364	0.142483	0.0795019	0.122966
Dy	4.84	0.7911	0.367629	0.729897	0.64245	0.616752	0.426322	0.797333	0.37293	0.738003	0.650693	0.624228	0.432742	0.948548	0.521017	0.807463
Y	18	4.55785	2.12744	4.12356	4.00555	3.30926	2.54975	4.58103	2.14716	4.15371	4.03621	3.33706	2.57362	5.36733	2.61442	4.5123
Ho	0.77	0.172035	0.079778	0.157973	0.144824	0.126243	0.0908988	0.173027	0.0806214	0.159263	0.146136	0.127433	0.0919201	0.200555	0.11554	0.178558
Er	1.73	0.518608	0.236879	0.469662	0.435193	0.379255	0.297871	0.520836	0.238774	0.47256	0.43814	0.381927	0.300165	0.600435	0.351073	0.521938
Tm	0.2	0.0737768	0.0360103	0.0692598	0.0635923	0.0510769	0.0424204	0.0740344	0.0362294	0.0695948	0.063933	0.0513858	0.0426856	0.0837638	0.0510893	0.079437
Yb	1.1	0.513035	0.258828	0.492943	0.440489	0.344582	0.305379	0.514452	0.260033	0.494785	0.442363	0.346281	0.306838	0.533218	0.345665	0.532798
Lu	0.14	0.0738246	0.0396141	0.0752309	0.0691821	0.0501425	0.0489755	0.0740049	0.0397675	0.0754654	0.0694205	0.0503587	0.0491611	0.0873375	0.0547526	0.0845031
x - basanite proportion in the mix
								0.13	0.11	0.17	0.17	0.15	0.13	3.23	1.85	3.23
								0.0013	0.0011	0.0017	0.0017	0.0015	0.0013	0.0323	0.0185	0.0323
								0.9987	0.9989	0.9983	0.9983	0.9985	0.9987	0.9677	0.9815	0.9677
Sample	Basanite	HD6	HD24/2	HD30	HD38	HD58	HD68	HD6	HD24/2	HD30	HD38	HD58	HD68	HD6	HD24/2	HD38
x - basanite proportion in the mix (wt.%)
Rb	49	-	0.0150678	0.0120919	0.0188184	0.0118347	0.00427418	#VALUE!	0.0689512	0.0953713	0.102086
Ba	589	0.0359816	0.0964077	0.0520901	-	0.0594995	0.0456984	0.801635	0.744202	1.0533	#VALUE!
Nb	72	0.022812	0.0410486	0.0294369	0.0467993	0.0119364	0.0350753	0.116382	0.120203	0.151787	0.16912
K	21667	-	-	-	-	-	-	#VALUE!	#VALUE!	#VALUE!	#VALUE!
La	47.5	0.375184	0.728429	0.162203	0.216896	0.562396	0.0943899	0.436446	0.779877	0.242677	0.297277
Ce	97.1	1.04764	1.31501	0.586038	0.688767	1.50481	0.33456	1.17251	1.42037	0.750112	0.852667
Pb	3.4	0.137807	0.217078	0.104135	0.26113	0.184894	0.110941	0.142047	0.220579	0.109738	0.266466
Pr	11.31	0.169551	0.128459	0.111408	0.125847	0.222172	0.0627192	0.184033	0.140758	0.130446	0.14486
Sr	1003	18.9786	14.6544	12.1868	13.7103	33.1592	6.71111	20.2578	15.7416	13.8712	15.3921
Nd	43.8	0.993466	0.578986	0.688278	0.754236	1.11779	0.387757	1.04911	0.626529	0.761568	0.827414
Sm	9.04	0.38481	0.160016	0.310835	0.315836	0.343539	0.175598	0.396062	0.169784	0.325674	0.330667
Zr	304	9.14452	3.06118	6.41442	7.0044	6.30481	3.43857	9.52784	3.39222	6.92031	7.50929
Hf	7.27	0.274371	0.0987476	0.210849	0.211265	0.205363	0.117675	0.283466	0.106636	0.222849	0.223265
Eu	2.63	0.159386	0.0723533	0.122763	0.1256	0.134003	0.0762053	0.162598	0.0751667	0.127026	0.129857
Ti	14928	1076.33	513.812	891.556	932.156	912.062	558.414	1094.33	529.668	915.418	955.949
Gd	6.76	0.559074	0.252332	0.485724	0.472772	0.481462	0.285284	0.567135	0.25949	0.49639	0.48346
Tb	0.92	0.108404	0.048301	0.088152	0.0904591	0.0877005	0.0546162	0.109459	0.0492599	0.0895661	0.0918693
Dy	4.84	0.7911	0.367629	0.626686	0.64245	0.616752	0.426322	0.796363	0.372548	0.633848	0.649586
Y	18	4.55785	2.12744	3.55466	4.00555	3.30926	2.54975	4.57532	2.1449	3.57922	4.02934
Ho	0.77	0.172035	0.079778	0.141223	0.144824	0.126243	0.0908988	0.172812	0.0805372	0.142292	0.145887
Er	1.73	0.518608	0.236879	0.41682	0.435193	0.379255	0.297871	0.520183	0.238522	0.419052	0.437394
Tm	0.2	0.0737768	0.0360103	0.06301	0.0635923	0.0510769	0.0424204	0.0739409	0.0361907	0.0632429	0.0638242
Yb	1.1	0.513035	0.258828	0.43228	0.440489	0.344582	0.305379	0.513798	0.259753	0.433415	0.44161
Lu	0.14	0.0738246	0.0396141	0.0653048	0.0691821	0.0501425	0.0489755	0.0739106	0.0397245	0.0654318	0.0693024

## Sheet: Ol
Major element composition of olivine.
Rock	Lherzolite
Sample	HD24/2						HD5															HD52															HD38
Type	Ol	Ol	Ol	Ol3	Ol3	Ol4	Ol	Ol	Ol	Ol	Ol	Ol	Ol	Ol	Ol3	Ol3	Ol3	Ol3	Ol3	Ol4	Ol4	Ol	Ol	Ol1	Ol1	Ol2	Ol2	Ol2	Ol3	Ol3	Ol3	Ol3	Ol3	Ol3	Ol3	Ol3	Ol	Ol	Ol	Ol	Ol3	Ol3	Ol3	Ol3	Ol3	Ol3	Ol3	Ol3	Ol3
Position*	center	center	edge	edge	edge	edge	center	center	center	center	center	center	edge	edge	center	center	edge	edge	edge	edge	edge	center	center	edge	edge	edge	edge	edge	edge	edge	edge	edge	edge	edge	edge	edge	center	center	center	edge	edge	edge	edge	edge	edge	edge	edge	edge	edge
Point #	HD24-2-49	HD24-2-50	HD24-2-19	HD24-2-7	HD24-2-8	HD24-2-37	HD5-69	HD5-70	HD5-44	HD5-45	HD5-28	HD5-29	HD5-1	HD5-2	HD5-51	HD5-52	HD5-19	HD5-35	HD5-18	HD5-13	HD5-11	HD52-44	HD52-45	HD52-1	HD52-2	HD52-4	HD52-6	HD52-5	HD52-27	HD52-28	HD52-34	HD52-35	HD52-38	HD52-39	HD52-18	HD52-19	HD38-25	HD38-25	HD38-26	HD38-10	HD38-29	HD38-41	HD38-14	HD38-28	HD38-34	HD38-35	HD38-38	HD38-39	HD38-40
SiO2	40.944	41.038	41.156	40.748	40.892	41.291	42.078	40.829	41.175	41.248	40.532	40.935	42.016	41.398	41.137	41.349	40.899	41.095	41.493	40.937	41.013	41.464	40.861	41.636	41.583	38.674	39.405	39.157	40.994	40.265	40.289	40.323	40.105	39.615	40.939	41.053	40.918	40.993	40.042	41.67	41.075	39.159	41.29	40.554	40.228	40.879	40.779	40.387	40.595
TiO2	0.057	0.012	-	-	0.012	0.03	-	-	-	-	0.018	-	0.021	0.039	0.03	-	0.018	0.054	0.015	-	-	-	0.006	0.027	0.04	0.119	-	-	0.079	0.024	0.018	0.042	0.054	0.042	0.067	0.027	0.021	-	0.027	0.018	0.036	0.027	-	0.01	0.009	-	0.004	0.008	0.01
Al2O3	-	0.009	0.009	-	0.02	0.006	0.056	-	-	0.012	-	0.016	0.042	0.008	0.006	-	0.011	-	-	-	0.105	0.015	0.062	-	-	0.249	0.138	0.22	0.099	0.042	-	-	0.031	0.016	0.016	-	0.005	0.013	0.013	-	0.078	-	0.008	0.022	-	-	0.059	-	0.02
Cr2O3	-	0.04	0.015	0.078	0.07	0.06	0.053	-	0.05	0.068	0.075	0.025	0.055	-	0.03	0.018	0.058	-	0.083	0.088	0.095	0.03	0.02	0.01	0.065	0.026	0.041	0.087	0.141	0.145	0.015	0.029	0.014	0.063	0.077	0.057	0.025	0.033	0.012	0.028	0.11	-	-	0.041	-	0.015	0.04	-	0.025
FeO	8.887	8.978	9.058	8.876	8.665	8.866	9.287	9.14	9.1	9.052	9.069	9.064	9.11	8.957	8.98	9.26	9.164	9.173	8.658	9.316	9.057	9.148	8.851	8.961	8.595	20.801	19.789	23.419	11.341	11.703	14.542	13.541	17.418	16.203	8.69	8.794	9.883	10.072	9.742	9.781	10.072	19.945	9.58	10.036	13.894	9.964	12.116	11.672	11.229
MnO	0.146	0.139	0.131	0.148	0.153	0.145	0.124	0.144	0.12	0.146	0.134	0.132	0.134	0.132	0.126	0.116	0.129	0.153	0.14	0.132	0.135	0.123	0.121	0.131	0.105	0.326	0.304	0.345	0.179	0.189	0.225	0.204	0.291	0.235	0.165	0.158	0.132	0.174	0.127	0.154	0.132	0.433	0.14	0.18	0.237	0.174	0.268	0.266	0.142
MgO	48.546	48.045	47.573	47.63	46.974	48.122	49.316	49.29	49.33	49.54	49.652	49.236	48.953	48.939	49.257	49.805	48.874	49.238	48.932	48.535	48.127	48.909	48.673	48.813	48.877	37.257	38.958	35.6	46.327	45.6	44.11	44.523	41.574	43.191	48.531	48.232	48.231	47.513	47.958	48.457	49.171	39.467	48.592	47.891	45.058	47.934	44.907	46.479	46.913
CaO	0.091	0.068	0.064	0.088	0.061	0.1	0.073	0.072	0.089	0.074	0.082	0.069	0.054	0.047	0.081	0.068	0.081	0.151	0.076	0.221	0.643	0.063	0.056	0.084	0.06	0.372	0.31	0.463	0.146	0.181	0.278	0.287	0.221	0.186	0.199	0.235	0.091	0.093	0.073	0.093	0.055	0.243	0.095	0.089	0.155	0.105	0.463	0.215	0.153
NiO	0.39	0.377	0.39	0.299	0.305	0.336	0.374	0.419	0.376	0.354	0.396	0.364	0.418	0.415	0.333	0.347	0.353	0.343	0.358	0.374	0.393	0.407	0.395	0.38	0.393	0.167	0.157	0.133	0.205	0.205	0.15	0.162	0.177	0.184	0.198	0.212	0.337	0.328	0.356	0.381	0.303	0.111	0.275	0.272	0.255	0.193	0.285	0.29	0.312
TOTAL	99.061	98.706	98.396	97.87	97.152	98.956	101.361	99.894	100.24	100.494	99.958	99.841	100.803	99.935	99.98	100.963	99.587	100.207	99.755	99.603	99.568	100.159	99.045	100.042	99.718	97.991	99.102	99.424	99.511	98.354	99.627	99.111	99.885	99.735	98.882	98.768	99.643	99.219	98.35	100.582	101.032	99.385	99.98	99.095	99.836	99.264	98.921	99.317	99.399
Fo	0.906883	0.905132	0.90351	0.905368	0.906237	0.90634	0.904466	0.905791	0.906233	0.907041	0.907073	0.906408	0.905485	0.906901	0.907231	0.905564	0.904839	0.905392	0.909716	0.902804	0.904524	0.905051	0.907444	0.906645	0.910223	0.761527	0.778266	0.730474	0.879269	0.874164	0.843944	0.854273	0.809721	0.826162	0.908733	0.907222	0.896916	0.893735	0.897717	0.898299	0.896949	0.779149	0.90043	0.894823	0.852547	0.895582	0.868561	0.876537	0.881637
Note: Ol - center of primary olivine without reaction rim, Ol1 - center of primary olivine with reaction rim, Ol2 - rim of primary Ol1, Ol3 - olivine from reaction rim after Opx1, Ol4 - olivine from reaction rim after Cpx1; *position - position of olivine grain in xenolith, center - center of xenolith, edge - edge of xenolith.
[truncated: 46 more columns]

## Sheet: Sp
Major element composition of spinel.
Rock	Lherzolite
Sample	HD5						HD38			HD24/2							HD6/1							HD2
Position*	-						edge	edge	center	edge	edge	center					-							-
Type	Sp1	Sp1	Sp1	Sp	Sp	Sp2	Sp1	Sp1	Sp	Sp1	Sp1	Sp	Sp1**	Sp1**	Sp1**	Sp2**	Sp3	Sp3	Sp3	Sp1	Sp1	Sp1	Sp1	Sp1	Sp1	Sp1	Sp1
Point #	HD-5-31	HD-5-56	HD-5-60	HD-5-65	HD-5-66	HD-5-32	HD-38-6	HD-38-19	HD-38-22	HD-24/2-5	HD-24/2-6	HD-24/2-56	HD-24/2-3-1-1	HD-24/2-3-1-3	HD-24/2-3-1-4	HD-24/2-3-1-11	HD-6/1-19	HD-6/1-20	HD-6/1-21	HD-6/1-32	HD-6/1-33	HD-6/1-34	HD-6/1-35	HD-2-19	HD-2-20	HD-2-27	HD-2-28
SiO2	-	-	-	-	-	-	-	-	-	-	-	-	-	-	-	-	0.052	-	-	-	-	-	0.052	-	-	-	-
TiO2	0.162	0.273	0.213	0.131	0.091	1.343	0.246	0.252	0.148	0.174	0.083	0.134	1.72	0.15	0.15	14.96	0.163	0.111	0.198	0.067	0.149	0.137	0.268	0.14	0.077	0.175	0.089
Al2O3	51.234	51.233	51.538	51.634	51.538	32.612	57.591	57.183	58.093	49.997	50.947	51.606	43.48	50.75	50.54	5.42	58.103	58.306	58.435	58.736	58.525	58.293	58.64	54.907	55.012	55.003	54.982
Cr2O3	15.557	15.676	14.591	15.483	15.407	27.998	8.223	8.108	7.942	13.641	14.169	13.834	13.14	13.74	13.77	14.73	8.823	8.844	8.795	8.739	8.538	8.734	8.842	12.176	11.81	11.612	11.846
V2O3	0.028	0.044	0.06	0.054	0.079	0.265	-	0.042	0.02	0.045	0.09	0.028	-	-	-	-	0.003	0.014	0.039	0.008	0.01	0.048	0.037	0.033	0.028	0.06	0.047
Fe2O3	2.48117	2.14585	3.26926	2.30748	2.4821	4.69161	2.30509	3.2378	2.15354	2.76888	3.49467	2.85443	9.37948	4.11068	3.28866	21.5655	1.01269	2.04341	1.17095	1.92314	1.85544	2.25771	1.67458	2.85513	3.63306	2.91933	3.07792
FeO	8.04933	7.57006	7.75416	8.39163	8.34249	10.6583	7.88877	7.83848	7.57314	7.35243	7.33633	8.42345	19.9899	13.691	12.1707	36.8544	9.09174	8.66124	9.27232	8.73347	8.79439	8.65541	9.27414	7.64882	7.1608	7.45005	7.77134
MnO	0.116	0.107	0.123	0.133	0.135	0.16	0.115	0.113	0.104	0.137	0.114	0.099	0	0.32	0.25	0.66	0.085	0.108	0.097	0.104	0.115	0.102	0.094	0.093	0.104	0.113	0.149
MgO	20.378	20.719	20.644	20.222	20.234	16.664	21.063	21.117	21.211	19.854	20.153	19.899	13.56	17.03	17.64	5.74	20.61	20.767	20.611	20.794	20.701	20.851	20.712	21.212	21.563	21.299	21.07
NiO	0.298	0.292	0.359	0.364	0.329	0.219	0.331	0.424	0.358	0.314	0.355	0.382	-	-	-	-	-	0.392	0.014	0.381	0.354	0.377	0.387	0.372	0.378	0.281	0.34
ZnO	0.107	0.105	0.078	0.085	0.056	0.147	0.084	0.056	0.11	0.08	0.726	0.086	-	-	-	-	0.076	0.109	0.116	0.126	0.129	0.086	0.1	0.092	0.07	0.111	0.111
TOTAL	98.4105	98.1649	98.6294	98.8051	98.6936	94.7579	97.8469	98.3713	97.7127	94.3633	97.468	97.3459	101.269	99.7917	97.8094	100.08	98.0194	99.3557	98.7483	99.6116	99.1708	99.5411	100.081	99.5289	99.8359	99.0234	99.4833
Mg#	0.81863	0.829923	0.825983	0.811191	0.812179	0.735973	0.822586	0.827678	0.833153	0.828012	0.830439	0.808126	0.547389	0.689218	0.720988	0.217331	0.80165	0.810419	0.798512	0.809341	0.80757	0.811142	0.799266	0.831773	0.842982	0.835987	0.828586
Cr#	0.169225	0.170302	0.159608	0.167469	0.167043	0.365451	0.0874109	0.0868562	0.0840066	0.154711	0.157233	0.15242	0.168559	0.153705	0.15453	0.645784	0.0924493	0.0923561	0.0917072	0.0907517	0.0891416	0.0913308	0.0918596	0.129498	0.125885	0.124055	0.126281
Note: Sp - center of primary spinel without reaction rim, Sp1 - center of primary spinel with reaction rim; Sp2 - spinel from reaction rim after primary Sp1; Sp3 - spinel from reaction rim after primary Opx1; *position - position of spinel grain in xenolith, center - center of xenolith, edge - edge of xenolith; **-Secondary Electron Microscope analysis.

## Sheet: Fs
Major element composition of feldspar.
Rock	Lherzolite
Sample	HD38										HD24/2							HD5										HD2													HD6/2
Type	Fs	Fs	Fs	Fs-2	Fs-2	Fs-2	Fs-1	Fs-1	Fs-1	Leucite	Fs-2	Fs-2	Fs-2	Fs-1	Fs-1	Leucite	Leucite	Fs-1	Fs-1	Fs-1	Fs-2	Fs-2	Fs-2	Fs-2	Fs-2	Fs-3	Fs-3	Fs-2	Fs-2	Fs-2	Fs-2	Fs-1	Fs-1	Fs-1	Fs	Fs	Fs	Fs	Fs	Fs	Fs-1	Fs-1	Fs-1	Fs-1	Fs	Fs-3	Fs-3	Fs-3
Position*	center	center	center	edge	edge	edge	edge	edge	edge	edge	edge	edge	edge	edge	edge	edge	edge	-	-	-	-	-	-	-	-	-	-	-	-	-	-	-	-	-	-	-	-	-	-	-	-	-	-	-	-	-	-	-
Point #	HD-38-20	HD-38-21	HD-38-22	HD-38-26	HD-38-30	HD-38-31	HD-38-59	HD-38-79	HD-38-95	HD-38-42	HD-24/2-9	HD-24/2-10	HD-24/2-43	HD-24/2-34	HD-24/2-35	HD-24/2-26	HD-24/2-27	HD-5-7	HD-5-8	HD-5-62	HD-5-38	HD-5-49	HD-5-50	HD-5-22	HD-5-23	HD-5-33	HD-5-34	HD-2-23	HD-2-24	HD-2-10	HD-2-11	HD-2-16	HD-2-17	HD-6/1-6	HD-6/1-9	HD-6/1-10	HD-6/1-25	HD-6/1-26	HD-6/1-44	HD-6/1-45	HD-6/2-11	HD-6/2-12	HD-6/2-33	HD-6/2-34	HD-6/2-25	HD-6/2-18	HD-6/2-19	HD-6/2-20
SiO2	66.362	66.952	66.291	66.888	66.857	67.865	63.54	63.22	55.829	55.518	66.613	65.864	67.095	64.955	63.547	56.081	55.259	65.133	61.577	67.275	63.422	66.895	68.039	67.647	66.552	58.96	63.724	66.873	68.107	67.355	66.75	65.679	65.954	61.935	65.473	66.506	64.401	65.547	56.502	59.03	63.82	59.131	56.825	52.991	63.731	60.665	62.982	59.557
TiO2	0.075	0.102	0.084	0.079	0.082	0.099	0.212	0.26	0.119	0.114	0.081	0.068	0.145	0.046	0.148	0.161	0.098	0.049	0.102	0.04	0.114	0.096	0.139	0.059	0.04	0.318	0.277	-	-	-	-	-	-	0.146	0.115	0.277	0.202	0.27	0.234	0.224	0.096	0.215	0.122	0.019	0.266	0.753	0.198	0.235
Al2O3	19.28	18.908	19.051	19.489	19.279	19.041	21.703	22.153	25.901	21.245	17.243	17.334	17.625	19.588	19.187	21.869	21.165	20.549	22.651	18.272	21.97	18.053	18.351	17.825	17.444	20.612	21.603	18.259	18.098	17.957	18.386	19.672	19.597	23.145	18.944	19.299	19.781	19.478	25.4	25.451	21.324	20.828	27.763	28.419	21.74	21.815	22.752	24.164
Cr2O3	0.005	0.024	-	0.003	-	-	0.016	0.019	0.003	0.008	-	0.034	0.005	-	0.018	0.055	0.029	0.018	0.018	-	-	-	0.024	-	0.021	5.139	0.073	-	-	-	-	-	-	-	-	-	-	-	-	-	0.018	0.065	-	0.092	0.034	0.094	0.039	0.445
FeO	0.37	0.375	0.376	0.283	0.24	0.374	0.338	0.661	0.358	0.561	0.356	0.351	0.392	0.186	0.218	0.607	0.646	0.234	0.321	0.193	0.255	0.289	0.215	0.426	0.783	2.067	0.221	0.421	0.52	0.367	0.349	0.174	0.162	0.426	0.34	0.321	0.368	0.367	0.338	0.256	0.225	0.556	0.245	0.272	0.43	0.488	0.4	0.527
MnO	-	0.004	0.023	0.011	0.007	-	-	0.005	0.016	-	-	-	0.013	-	-	0.012	0.015	0.003	-	0.01	-	-	0.014	-	-	-	0.007	-	-	-	-	-	-	-	-	-	-	-	-	-	0.01	0.023	-	-	0.01	0.004	0.002	0.018
MgO	0.029	0.01	0.165	-	-	0.026	0.03	0.351	0.061	-	0.002	0.028	0.024	0.027	0.123	0.028	0.012	0.006	0.188	0.004	-	-	-	0.069	0.754	1.127	-	-	-	-	-	-	-	0.069	-	-	0.125	0.053	0.088	0.005	0.292	1.387	0.082	0.142	0.229	0.687	0.003	0.099
CaO	-	-	-	-	-	-	3.36	3.842	8.441	-	-	-	-	1.554	1.648	-	-	2.153	4.973	-	3.893	-	-	-	-	1.266	2.919	-	-	-	-	0.665	0.974	4.46	-	-	1.012	0.327	8.197	7.5	3.837	7.16	9.995	11.856	3.003	4.908	3.886	5.803
Na2O	5.002	5.016	4.863	5.371	5.175	5.313	7.981	6.872	6.091	0.047	5.506	5.191	5.971	8.034	8.041	0.032	0.026	6.602	8.436	5.188	8.884	5.468	5.579	5.923	5.679	7.773	8.41	6.367	6.828	6.018	6.183	7.081	7.302	8.396	5.711	5.903	7.005	6.728	6.732	7.46	8.629	7.444	6.194	4.95	8.577	7.873	8.953	8.375
K2O	9.531	9.917	9.929	8.509	8.993	8.604	2.149	1.671	0.67	19.861	9.173	9.186	8.605	4.246	3.904	20.596	20.805	5.493	0.832	9.91	1.551	9.774	9.384	8.668	8.08	3.913	2.468	8.331	7.44	8.751	8.547	6.584	5.909	1.155	9.172	8.808	5.867	6.99	0.648	0.67	1.88	0.79	0.296	0.266	2.661	1.214	1.186	0.707
V2O3	0.008	-	0.01	0.012	0.032	0.006	0.03	0.05	0.016	0.011	-	-	0.013	0.044	-	0.01	-	0.021	-	-	0.034	0.014	0.008	-	-	0.019	0.027	-	-	-	-	-	-	-	-	-	-	-	-	-	-	0.011	0.034	-	0.033	0.126	0.043	0.028
NiO	0.05	0.024	-	0.03	-	0.015	-	0.023	0.024	0.01	-	-	0.016	0.005	0.012	-	0.014	0.012	0.002	-	0.023	0.015	-	0.003	0.018	0.047	0.01	-	-	-	-	-	-	-	-	-	-	-	-	-	0.023	0.01	0.012	0.017	0.046	0.013	0.028	0.025
ZnO	0.011	0.016	-	0.001	-	-	0.007	0.015	-	-	-	-	-	-	0.012	0.02	0.007	-	0.017	-	-	-	-	-	-	-	0.01	-	-	-	-	-	-	-	-	-	-	-	-	-	-	0.001	0.014	-	-	-	-	-
Total	100.723	101.348	100.792	100.676	100.665	101.343	99.366	99.142	97.529	97.375	98.974	98.056	99.904	98.685	96.858	99.471	98.076	100.273	99.117	100.892	100.146	100.604	101.753	100.62	99.371	101.241	99.749	100.251	100.993	100.448	100.215	99.855	99.898	99.732	99.755	101.114	98.761	99.76	98.139	100.596	100.154	97.621	101.582	99.024	100.76	98.64	100.472	99.983
Si (a.p.u.)	11.9274	11.9805	11.943	11.9511	11.969	12.0421	11.3951	11.3656	10.3197	10.9819	12.1673	12.144	12.1336	11.753	11.7378	10.9097	10.9311	11.6441	11.1012	12.0699	11.296	12.0614	12.0897	12.1319	12.1519	11.2659	11.4127	12.0315	12.1075	12.0969	12.0177	11.8039	11.8186	11.0849	11.8971	11.9069	11.7297	11.8394	10.3967	10.5553	11.3966	11.0696	10.1116	9.73894	11.3627	11.159	11.1896	10.7639
Al	4.08378	3.98737	4.04487	4.10374	4.06748	3.98178	4.58691	4.69354	5.64226	4.95255	3.71173	3.76655	3.75627	4.17694	4.17665	5.01366	4.9341	4.32938	4.81249	3.86336	4.61151	3.83603	3.8428	3.7674	3.7537	4.6415	4.55964	3.87148	3.79162	3.80073	3.90109	4.16655	4.13852	4.88184	4.05678	4.07195	4.24592	4.1462	5.508	5.3633	4.48762	4.59509	5.82204	6.15529	4.56795	4.72903	4.76372	5.14679
Fe(ii)	0.055607	0.0561107	0.0566432	0.0422814	0.0359273	0.0554922	0.0506863	0.099367	0.0553341	0.0927915	0.0543735	0.0541159	0.0592771	0.0281419	0.0336706	0.0987388	0.106855	0.0349803	0.0483906	0.0289541	0.0379775	0.0435716	0.0319448	0.0638843	0.11955	0.330257	0.0330965	0.0633367	0.0772985	0.0551153	0.0525409	0.0261487	0.0242741	0.0637543	0.0516609	0.0480558	0.0560459	0.05543	0.0520056	0.0382772	0.0335972	0.0870351	0.0364542	0.0418005	0.0641067	0.0750602	0.0594237	0.0796437
Ca	-	-	-	-	-	-	0.645553	0.739975	1.67156	-	-	-	-	0.301239	0.326115	-	-	0.412354	0.960491	-	0.74283	-	-	-	-	0.259157	0.56007	-	-	-	-	0.128039	0.186985	0.855172	-	-	0.197467	0.063277	1.61587	1.43675	0.734059	1.43599	1.90539	2.33437	0.5736	0.967193	0.739641	1.1236
Na	1.74292	1.74011	1.69852	1.86047	1.7961	1.8277	2.77483	2.39513	2.18275	0.0180239	1.94975	1.85556	2.09341	2.81824	2.87945	0.0120685	0.00997106	2.28817	2.94848	1.8045	3.06761	1.91135	1.92187	2.05936	2.01031	2.87942	2.92005	2.22082	2.35324	2.09538	2.15812	2.46718	2.53674	2.91325	2.01187	2.04889	2.47349	2.35597	2.4015	2.58609	2.98735	2.70166	2.13677	1.76369	2.96466	2.8076	3.08371	2.93448
K	2.1851	2.2636	2.28177	1.93931	2.05364	1.94745	0.491605	0.383198	0.157976	5.01132	2.13725	2.16048	1.98499	0.980002	0.919836	5.11079	5.24972	1.25263	0.191331	2.26794	0.352374	2.24794	2.12694	1.98294	1.88193	0.953733	0.56382	1.91195	1.68712	2.00479	1.96287	1.50937	1.35067	0.263686	2.12595	2.01152	1.36307	1.61051	0.152095	0.15282	0.428237	0.188648	0.0671861	0.0623591	0.605181	0.284849	0.268776	0.162992
TOTAL	19.9948	20.0277	20.0248	19.8969	19.9221	19.8546	19.9447	19.6768	20.0296	21.0565	20.0204	19.9807	20.0275	20.0576	20.0735	21.1449	21.2317	19.9616	20.0624	20.0347	20.1083	20.1003	20.0133	20.0055	19.9174	20.3299	20.0494	20.0991	20.0168	20.0529	20.0923	20.1011	20.0558	20.0626	20.1434	20.0873	20.0657	20.0708	20.1261	20.1325	20.0674	20.078	20.0794	20.0964	20.1382	20.0227	20.1048	20.2114
Note: Fs - feldspar from veins, Fs1 - feldspar from reaction rim of Cpx1; Fs2 - feldspar from reaction rim of Opx1; Fs3 - feldspar from reaction rim of Sp1; *position - position of Fs grain in xenolith, center - center of xenolith, edge - edge of xenolith.

## Sheet: Opx
Major and trace element composition of orthopyroxene.
Rock	Lherzolite
Sample	HD38					HD5								HD24/2				HD2					HD6/1						HD52
Type	Opx		Opx	Opx	Opx	Opx1	Opx1	Opx1	Opx	Opx	Opx	Opx2	Opx2	Opx1	Opx1	Opx	Opx	Opx1	Opx1	Opx1	Opx	Opx	Opx	Opx	Opx1	Opx1	Opx1	Opx1	Opx1	Opx1	Opx1	Opx1	Opx1	Opx1	Opx	Opx
Point #	HD-38-7		HD-38-8	HD-38-23	HD-38-24	HD5-16	HD5-17	HD5-40	HD5-41	HD5-42	HD5-43	HD5-26	HD5-27	HD24-2-17	HD24-2-44	HD24-2-47	HD24-2-48	HD2-3	HD2-4	HD2-5	HD2-21	HD2-22	HD6/1-13	HD6/1-14	HD6/1-27	HD6/1-28	HD6/1-37	HD6/1-38	HD52-7	HD52-8	HD52-36	HD52-37	HD52-9	HD52-10	HD52-46	HD52-47
SiO2	55.564		54.432	55.524	55.153	55.712	55.935	55.377	56.548	55.204	55.642	56.764	56.931	55.053	55.549	55.618	55.207	56.632	56.06	56.545	55.636	56.363	54.906	54.942	54.823	55.027	54.978	54.321	55.726	55.796	55.55	56.41	57.004	55.539	55.981	55.675
TiO2	0.2		0.205	0.166	0.163	0.091	0.106	0.045	0.057	0.012	0.079	0.091	0.07	0.118	0.115	0.042	0.13	0.085	0.079	0.109	0.091	0.088	0.097	0.058	0.085	0.182	0.137	0.113	0.108	0.108	0.151	0.126	0.098	0.12	0.101	0.068
Al2O3	4.179		4.216	4.271	4.488	3.582	3.621	3.595	3.554	3.974	3.853	0.293	0.239	4.048	4.342	4.154	4.055	3.846	3.761	3.805	3.958	3.947	4.185	4.256	4.598	4.726	4.361	4.266	4.438	4.147	4.003	3.911	4.068	3.989	4.085	4.218
Cr2O3	0.242		0.249	0.254	0.259	0.359	0.405	0.372	0.351	0.476	0.336	0.332	0.375	0.436	0.515	0.471	0.397	0.316	0.295	0.408	0.336	0.494	0.238	0.367	0.36	0.294	0.286	0.294	0.418	0.309	0.377	0.349	0.326	0.402	0.415	0.346
FeO	6.123		6.209	6.166	6.104	5.694	5.547	5.894	5.809	5.758	5.709	5.416	5.31	5.79	5.694	5.713	5.753	5.659	5.696	5.537	5.624	5.553	6.691	6.772	6.714	6.81	6.813	6.565	5.612	5.611	5.454	5.678	5.671	5.603	5.607	5.539
MnO	0.125		0.147	0.145	0.122	0.122	0.139	0.155	0.152	0.121	0.12	0.156	0.146	0.111	0.135	0.146	0.137	0.136	0.111	0.138	0.109	0.118	0.139	0.128	0.147	0.14	0.149	0.155	0.117	0.139	0.136	0.134	0.111	0.125	0.111	0.112
MgO	32.339		32.219	32.237	32.087	33.053	33.054	33.166	32.887	32.998	32.927	33.533	33.652	31.767	31.776	32.012	32.027	33.94	33.749	33.534	33.561	33.359	32.273	32.368	31.96	32.224	32.16	32.566	32.439	32.297	32.691	31.889	32.865	32.73	32.454	32.392
CaO	0.767		0.709	0.665	0.695	0.647	0.631	0.614	0.622	0.601	0.566	1.284	1.247	0.782	0.839	0.792	0.837	0.682	0.703	0.674	0.682	0.685	0.65	0.681	0.72	0.747	0.732	0.694	0.781	0.747	0.72	0.723	0.704	0.651	0.696	0.732
Na2O	0.157		0.154	0.105	0.086	0.086	0.102	0.12	0.106	0.119	0.128	0.128	0.153	0.086	0.134	0.144	0.085	0.117	0.117	0.134	0.136	0.08	0.116	0.117	0.043	0.073	0.157	0.141	0.132	0.14	0.139	0.066	0.076	0.099	0.1	0.113
K2O	0.008		-	-	-	0.011	-	0.004	0.001	0.012	-	0.008	-	-	-	0.005	-	-	-	0.009	-	-	0.011	-	-	0.006	-	-	0.006	-	-	-	0.006	-	0.005	-
NiO	0.106		0.102	0.095	0.121	0.098	0.086	0.078	0.11	0.088	0.129	0.091	0.08	0.12	0.098	0.11	0.078	-	-	-	-	-	0.088	0.101	0.118	0.088	0.081	0.08	0.093	0.107	0.078	0.107	0.09	0.112	0.101	0.097
Total	99.81		98.642	99.628	99.278	99.455	99.626	99.42	100.197	99.363	99.489	98.096	98.203	98.311	99.197	99.207	98.706	101.413	100.573	100.893	100.141	100.687	99.394	99.79	99.568	100.317	99.854	99.195	99.87	99.401	99.301	99.396	101.019	99.37	99.656	99.292
Mg#	0.903997		0.902453	0.903112	0.903587	0.91189	0.913971	0.909358	0.909858	0.910852	0.91137	0.916934	0.918692	0.907251	0.908672	0.909009	0.908469	0.914478	0.913522	0.915238	0.914084	0.914606	0.895827	0.894976	0.894591	0.894027	0.893796	0.898416	0.911548	0.911208	0.914431	0.909199	0.911756	0.912394	0.911657	0.912482
Method	LA-ICP-MS					SIMS								LA-ICP-MS
Point #	Opx#1	Opx#1*		Opx#2		Opx#2			Opx#1	Opx#4		Opx#3	Opx#5	Opx#1	Opx#4	Opx#5	Opx#6
Ba	0.0510271	0.0239354		0.0335986		0.0459055			0.14544	0.138119		4.66807	1.03978	0.0193126	0.0338988	-	0.016356
Nb	0.00364558	0.00719926		0.00722913		0.0253569			0.021826	0.0188129		0.355619	0.0913973	0.00877885	0.00724609	0.0117163	0.0106388
La	0.0024776	0.00455055		0.0023349		0.0217238			0.0447174	0.0474596		0.348544	0.0594615	0.0150519	0.0186371	0.0220234	0.0203697
Ce	0.0139355	0.013425		0.0145567		0.0741447			0.253991	0.230096		0.654633	0.101292	0.0390529	0.0629061	0.0848485	0.059077
Pr	0.0020229	0.00359337		0.00298897		-			-	-		-	-	0.0041586	0.00774363	0.0126382	0.0058772
Sr	0.186112	0.176193		0.180816		0.358044			0.40301	0.383217		5.88925	1.44027	0.350773	0.522831	0.588882	0.498997
Nd	0.0187295	0.0213487		0.0276595		0.0385259			0.0382967	0.0399267		0.106657	0.034152	0.0373493	0.0368014	0.0847793	0.0420586
Sm	0.0218646	0.018214		0.0217027		0.0237068			0.034154	0.0255928		0.0261124	0.0125815	0.0159851	0.0189824	0.0220206	0.0182239
Zr	1.7063	1.64381		1.6206		0.896051			1.09864	1.01512		0.717063	0.259581	1.02593	1.12543	1.27795	1.11968
Hf	0.0537284	0.0446575		0.0407038		0.0615935			0.0543172	0.0298404		0.0407253	-	0.0288647	0.0348779	0.0406996	0.0314981
Eu	0.0118909	0.00903349		0.00979109		0.0118735			0.00756902	0.0066649		0.0367785	0.0157764	0.00957116	0.00659066	0.0136467	0.0116112
Ti	916.331	851.502		838.701		461.125			509.182	486.279		649.257	405.178	641.097	666.84	664.883	650.268
Gd	0.0515573	0.0408358		0.0526763		0.0362405			0.0422793	0.0215996		0.0268237	0.0120445	0.0444025	0.0505054	0.0427414	0.0493503
Tb	0.0142558	0.0143068		0.0136944		-			-	-		-	-	0.0111193	0.0115686	0.0122284	0.0128677
Dy	0.126407	0.154952		0.145019		0.0666101			0.0974328	0.0512232		0.0488431	0.053676	0.106679	0.118191	0.122692	0.118802
Y	1.17066	1.21338		1.13067		0.729686			0.76016	0.738539		0.449005	0.427297	0.942013	0.970161	1.03788	0.989875
Ho	0.0449752	0.0414003		0.0410214		-			-	-		-	-	0.033132	0.0378995	0.0320459	0.0325283
Er	0.155088	0.167873		0.150041		0.11605			0.10237	0.104951		0.0572562	0.0559603	0.117627	0.125661	0.136552	0.121441
Tm	0.0314872	0.0282554		0.0288403		-			-	-		-	-	0.0239977	0.0230702	0.0291327	0.0256239
Yb	0.299111	0.283422		0.266393		0.192161			0.189275	0.18726		0.117408	0.175401	0.219374	0.214911	0.254714	0.240977
Lu	0.0528299	0.0525227		0.048963		-			-	-		-	-	0.0386241	0.0372231	0.039997	0.0390236
Note: Opx - center of primary orthopyroxene without reaction rim, Opx1 - center of primary orthopyroxene with reaction rim, Opx2 - reaction rim of Opx1.

## Sheet: Cpx
Major and trace element composition of clinopyroxene.
Rock	Lherzolite
Sample	HD38																																												HD5
Type	Cpx2	Cpx2	Cpx3	Cpx3	Cpx1	Cpx1	Cpx2	Cpx2	Cpx	Cpx	Cpx	Cpx	Cpx	Cpx	Cpx	Cpx	Cpx	Cpx	Cpx3	Cpx3	Cpx3		Cpx3	Cpx2	Cpx2	Cpx1	Cpx1	Cpx1	Cpx1	Cpx1	Cpx1	Cpx1	Cpx1	Cpx1	Cpx1	Cpx2	Cpx2	Cpx2	Cpx	Cpx2	Cpx2	Cpx2	Cpx2	Cpx2	Cpx1		Cpx2	Cpx	Cpx
Point #	HD38-3	HD38-4	HD38-11	HD38-12	HD38-33	HD38-34	HD38-35	HD38-36	HD38-7	HD38-8	HD38-9	HD38-10	HD38-11	HD38-12	HD38-13	HD38-14	HD38-15	HD38-16	HD38-27	HD38-32	HD38-33		HD38-37	HD38-77	HD38-78	HD38-81	HD38-82	HD38-83	HD38-84	HD38-85	HD38-86	HD38-87	HD38-88	HD38-89	HD38-90	HD38-92	HD38-93	HD38-43	HD38-47	HD38-46	HD38-49	HD38-58	HD38-94	No EPMA/SEM Data	HD5-3		HD5-5	HD5-57	HD5-58
SiO2	53.427	52.655	55.924	55.644	52.586	52.335	52.254	54.302	52.892	53.027	52.984	52.57	52.863	52.655	52.916	52.603	52.368	52.644	55.215	54.868	55.603		54.93	52.483	52.449	51.846	51.891	51.797	51.83	52.14	51.815	51.932	52.349	52.669	51.945	51.855	51.977	51.862	51.766	52.376	51.603	52.639	51.535		54		53.01	53.531	53.09
TiO2	0.862	0.712	0.199	0.236	0.597	0.653	0.64	0.766	0.68	0.664	0.644	0.654	0.643	0.618	0.617	0.605	0.612	0.63	0.248	0.22	0.234		0.213	0.963	0.875	0.62	0.718	0.696	0.652	0.674	0.667	0.662	0.642	0.617	0.64	1.232	0.729	1.148	0.645	0.718	1.569	1.172	1.618		0.38		0.54	0.305	0.286
Al2O3	3.125	4.704	0.385	0.491	6.763	6.794	4.799	1.929	6.687	6.911	6.603	6.834	6.656	6.805	6.873	6.922	6.598	6.787	0.501	0.349	0.364		0.46	2.459	2.552	6.693	7.014	6.932	7.049	6.705	6.958	6.736	6.721	6.801	6.802	3.589	3.732	2.491	6.752	4.901	3.532	1.836	4.141		5.53		3.09	5.704	5.943
Cr2O3	0.715	0.727	1.058	1.579	0.673	0.694	0.871	0.851	0.736	0.779	0.645	0.776	0.763	0.683	0.728	0.645	0.616	0.674	1.758	0.622	1.11		0.081	0.95	0.954	0.671	0.659	0.681	0.715	0.748	0.742	0.643	0.793	0.781	0.699	0.78	0.746	0.79	0.658	0.759	0.572	0.835	0.313		0.94		0.96	0.914	0.857
FeO	2.251	2.89	2.681	2.606	2.632	2.796	2.714	2.529	2.706	2.732	2.744	2.666	2.657	2.541	2.587	2.764	2.747	2.708	2.555	2.886	2.737		2.644	2.429	2.531	2.413	2.7	2.612	2.633	2.538	2.65	2.601	2.549	2.47	2.674	4.641	4.192	3.799	2.593	2.652	2.557	2.469	5.844		2.57		2.45	2.646	2.613
MnO	0.049	0.087	0.105	0.12	0.095	0.066	0.077	0.061	0.056	0.047	0.08	0.096	0.062	0.069	0.058	0.049	0.082	0.078	0.133	0.091	0.134		0.1	0.085	0.063	0.09	0.081	0.067	0.09	0.076	0.085	0.101	0.069	0.065	0.094	0.092	0.092	0.089	0.085	0.08	0.087	0.109	0.101		0.09		0.04	0.086	0.073
MgO	15.717	15.564	18.214	18.332	14.99	14.93	16.36	17.566	14.908	14.862	15.009	14.634	14.367	14.718	15.032	14.701	14.715	14.82	17.868	18.38	18.069		18.169	16.191	16.202	14.335	14.782	14.825	14.783	14.164	14.993	15.1	14.682	14.28	14.275	14.049	15.114	14.976	14.885	15.592	15.916	16.253	13.041		15.22		15.84	15.343	15.129
CaO	22.482	21.764	21.047	20.077	19.486	19.644	21.65	21.747	19.215	19.318	19.327	19.243	19.153	19.151	19.296	18.913	19.173	18.88	20.013	20.957	20.421		22.194	22.507	22.17	19.611	19.406	19.358	19.414	19.833	19.319	19.453	19.57	19.302	19.225	22.449	21.616	22.341	19.282	21.413	21.916	22.475	22.509		19.83		23.35	19.707	19.708
Na2O	1.014	0.986	0.772	0.907	1.992	1.913	0.604	0.501	1.883	1.869	1.96	1.927	1.897	1.933	1.911	1.905	1.887	1.923	1.033	0.708	0.719		0.378	0.618	0.817	1.94	1.924	1.891	1.96	1.95	1.909	1.941	1.991	1.954	1.892	0.715	0.506	0.725	1.991	0.609	0.626	0.713	0.773		1.95		0.65	1.845	1.929
K2O	0.133	0.011	-	0.003	-	0.003	-	0.003	0.01	0.006	0.017	0.009	-	0.008	-	-	0.01	0.009	0.005	0.003	-		0.014	0.004	0.015	0.006	-	-	0.007	0.005	0.001	0.003	-	0.002	-	0.015	-	0.013	0.008	0.007	0.017	0.019	0.015		-		-	-	-
NiO	0.033	0.029	0.039	0.061	0.054	0.034	0.031	0.042	0.083	0.052	0.049	0.063	0.075	0.046	0.08	0.052	0.065	0.019	0.04	0.008	0.039		0.05	0.023	0.009	0.013	0.048	0.03	0.081	0.003	0.037	0.039	0.062	0.058	0.081	0.039	-	0.034	0.07	0.014	0.055	0.052	0.006		0.05		0.06	0.029	0.034
Total	99.808	100.129	100.424	100.056	99.868	99.862	100	100.297	99.896	100.357	100.15	99.564	99.217	99.246	100.156	99.239	98.955	99.196	99.454	99.167	99.51		99.276	98.714	98.666	98.252	99.233	98.894	99.244	98.863	99.236	99.289	99.467	99.063	98.347	99.425	98.714	98.254	98.848	99.214	98.373	98.578	99.902		100.55		99.99	100.11	99.662
Mg#	0.925642	0.905675	0.923736	0.926154	0.910346	0.904944	0.914873	0.925282	0.907598	0.906532	0.906993	0.907291	0.906019	0.911714	0.911969	0.904604	0.905217	0.907038	0.925752	0.919058	0.921692		0.924537	0.922385	0.919439	0.913731	0.907071	0.910065	0.909173	0.908674	0.909805	0.911898	0.911263	0.911563	0.904923	0.843678	0.865375	0.87544	0.910989	0.912908	0.917338	0.921485	0.799137		0.913489		0.920275	0.911802	0.911682
Wo	48.7162	47.575	43.3347	42.076	45.8765	46.0537	46.464	45.1058	45.6232	45.811	45.5633	46.0757	46.4108	45.9589	45.6397	45.5006	45.804	45.2994	42.6019	42.8933	42.7152		44.7279	47.8864	47.4312	47.24	46.0431	46.0033	46.1012	47.6937	45.6517	45.6905	46.5454	46.9033	46.605	49.1288	46.9987	48.3398	45.8152	47.3284	47.5106	47.7122	48.2029		46.0208		49.3199	45.6276	45.9842
En	47.3927	47.3439	52.186	53.4624	49.1102	48.7077	48.8591	50.7001	49.2569	49.0442	49.2385	48.7602	48.4452	49.1507	49.476	49.2161	48.9189	49.4814	52.9292	52.3491	52.5947		50.9538	47.937	48.2358	48.0519	48.805	49.026	48.8498	47.3981	49.3019	49.3537	48.593	48.2872	48.1554	42.7846	45.7292	45.0921	49.2163	47.9567	48.0138	48.0138	38.8625		49.1586		46.5767	49.4334	49.1224
Fs	3.89105	5.08116	4.47938	4.46157	5.01334	5.23859	4.67685	4.19416	5.11992	5.14483	5.19821	5.16414	5.14398	4.89043	4.88432	5.2833	5.27703	5.21926	4.46892	4.75763	4.69007		4.31828	4.17666	4.33296	4.70817	5.15196	4.97075	5.04905	4.90819	5.04642	4.95581	4.86164	4.80953	5.23965	8.08659	7.27212	6.56806	4.96851	4.71487	4.47564	4.27395	9.93904		4.82064		4.10347	4.93906	4.89334
Al (IV)	0.056	0.09	-	-	0.104	0.111	0.103	0.034	0.089	0.091	0.092	0.093	0.073	0.087	0.095	0.087	0.09	0.087	-	-	-		-	0.064	0.067	0.097	0.115	0.113	0.118	0.095	0.119	0.117	0.102	0.079	0.092	0.08	0.071	0.066	0.113	0.077	0.091	0.055	0.09		0.063		0.07	0.072	0.081
Al (VI)	0.078	0.111	0.016	0.021	0.183	0.178	0.102	0.048	0.196	0.202	0.188	0.199	0.213	0.204	0.196	0.21	0.194	0.204	0.022	0.015	0.016		0.02	0.043	0.043	0.192	0.185	0.185	0.183	0.194	0.179	0.171	0.185	0.213	0.202	0.077	0.092	0.044	0.177	0.135	0.064	0.025	0.091		0.17		0.063	0.17	0.172
Al (VI)/ Al (IV)	1.39286	1.23333	-	-	1.75962	1.6036	0.990291	1.41176	2.20225	2.21978	2.04348	2.13978	2.91781	2.34483	2.06316	2.41379	2.15556	2.34483	-	-	-		-	0.671875	0.641791	1.97938	1.6087	1.63717	1.55085	2.04211	1.5042	1.46154	1.81373	2.6962	2.19565	0.9625	1.29577	0.666667	1.56637	1.75325	0.703297	0.454545	1.01111		2.69841		0.9	2.36111	2.12346
P (Putirka'08 eq32a, GPa)	0.67	0.853	0.168	0.378	1.652	1.601	0.623	0.269	1.613	1.611	1.642	1.649	1.655	1.658	1.625	1.655	1.622	1.656	0.462	0.093	0.16		-	0.261	0.414	1.65	1.627	1.609	1.645	1.655	1.609	1.609	1.66	1.687	1.646	0.556	0.524	0.355	1.655	0.716	0.441	0.167	0.661		1.585		0.363	1.532	1.589
T (Putirka'08 eq32a, °C)	1242	1274	1304	1309	1291	1288	1292	1287	1286	1285	1288	1284	1278	1286	1290	1287	1286	1288	1306	1310	1301		1300	1259	1264	1279	1288	1289	1290	1272	1293	1293	1284	1278	1281	1224	1266	1234	1292	1276	1253	1249	1197		1289		1248	1295	1295
Pyx. Name.	Diopside	Diopside	Augite	Augite	Diopside	Diopside	Diopside	Diopside	Diopside	Diopside	Diopside	Diopside	Diopside	Diopside	Diopside	Diopside	Diopside	Diopside	Augite	Augite	Augite		Augite	Diopside	Diopside	Diopside	Diopside	Diopside	Diopside	Diopside	Diopside	Diopside	Diopside	Diopside	Diopside	Diopside	Diopside	Diopside	Diopside	Diopside	Diopside	Diopside	Diopside		Diopside		Diopside	Diopside	Diopside
Point #					Cpx#31	Cpx#32	Cpx#34	Cpx#33		Cpx#20	Cpx#21								Cpx#6	Cpx#2	Cpx#1	Cpx#3	Cpx#7	Cpx#8		Cpx#9	Cpx#10	Cpx#11								Cpx#14	Cpx#13	Cpx#17	Cpx#15	Cpx#16				Cpx#12	Cpx#4	Cpx#4*	Cpx#6
Ba					0.475923	0.368959	2.1104	2.07076		0.615041	0.192206								9.60969	0.860872	79.8224	8.93348	2.96929	479.783		12.4979	4.58156	0.509425								5.61374	1.28973	16.8838	8.69793	530.844				52.4402	0.271725	0.236091	4.66377
Nb					0.422121	0.355407	0.507719	0.498181		0.562705	0.488338								0.473386	0.350303	1.22936	0.111925	0.27565	3.77647		0.629384	0.52765	0.605454								5.47155	1.6543	1.69394	0.583687	1.67825				0.801878	0.607847	0.65299	1.2626
La					1.38877	1.47411	1.29778	1.2734		1.49827	1.61768								1.13429	2.74204	3.99911	3.73396	6.3994	4.12468		1.68797	1.56177	1.73368								20.6616	7.98191	12.5489	2.15618	6.88482				2.90258	9.65368	10.0452	12.5104
Ce					4.61932	4.88189	4.40823	4.32542		5.25504	5.47618								2.87175	8.00529	9.25026	9.36143	14.1984	11.0554		5.15425	4.79426	5.05057								62.595	22.5501	39.3502	6.09197	14.3908				6.58714	16.6687	18.4684	28.4969
Pr					-	-	-	-		0.95955	0.889821								0.378032	1.07057	1.021	1.00126	1.69674	1.57263		0.822967	0.779243	0.875891								9.57432	3.15332	5.63248	1.01983	1.93932				0.985107	-	-	-
Sr					83.4152	82.6456	65.5707	64.3389		97.9666	105.092								83.1304	84.6953	102.649	105.384	108.639	336.613		100.557	93.9387	98.4052								124.712	104.65	115.845	109.951	653.447				186.866	132.167	139.11	75.3636
Nd					4.69237	5.25609	5.17307	5.0759		6.29542	5.82732								2.31101	6.19966	3.88785	4.38208	7.29274	9.97945		5.14192	5.30667	6.07846								55.0438	16.9532	28.684	6.51913	10.0109				6.14035	5.97267	6.94432	11.9112
Sm					2.05829	2.14993	2.51781	2.47052		2.57888	2.38288								0.865523	1.91798	0.982437	0.735523	1.13137	3.29957		2.18984	2.31679	2.27193								14.9446	4.91821	7.56058	2.5695	2.75989				2.20658	1.63691	1.95034	2.89351
Zr					37.1874	39.5262	39.6519	38.9071		40.1229	41.0991								3.37596	4.90804	6.05909	2.12888	8.04494	50.6585		37.5711	37.7183	38.5136								372.638	62.5485	62.9616	39.799	34.383				37.3234	21.9058	23.0038	25.1131
Hf					1.30801	1.45184	1.77237	1.73908		1.68676	1.55617								0.451485	0.560466	0.282189	0.141587	0.284225	2.27162		1.3385	1.51241	1.55053								11.7771	2.45135	2.61126	1.70348	1.52775				1.46824	0.960545	0.924738	0.967438
Eu					0.839989	0.824638	0.854813	0.838756		1.13457	0.921504								1.29271	1.70053	2.13608	2.41484	2.60765	1.83528		0.853165	0.882982	0.95591								4.18221	1.98137	2.82142	0.970017	1.42781				1.15091	0.631387	0.719159	1.10896
Ti					3566.12	3890.54	3705.62	3636.01		4007.36	3932.14								1544.99	1429.19	1420.84	1093.18	1364.94	5149.59		3871.46	4049.25	4254.82								17741.2	6104.37	6565.65	4119.44	4025.94				4018.02	2274.91	2274.38	2678.99
Gd					2.59186	2.77393	3.5042	3.43837		2.84477	3.6234								1.30784	2.70434	1.58297	0.648484	1.21874	5.51269		3.31072	3.65316	3.48999								16.3022	5.00766	7.39208	3.37352	3.87922				2.94996	1.93239	2.60742	3.23954
Tb					-	-	-	-		-	-								-	-	-	-	-	-		-	-	-								-	-	-	-	-				-	-	-	-
Dy					3.64044	4.03727	4.22858	4.14915		4.20548	4.21256								1.94112	3.08189	1.20629	0.671103	0.822064	5.69347		3.84624	3.75063	4.27519								12.4054	5.4628	7.02866	3.97173	4.14317				3.84599	2.56273	2.58034	3.18969
Y					21.6742	23.3424	24.6973	24.2334		-	-								-	-	-	-	-	-		-	-	-								-	-	-	-	-				-	15.0197	15.2349	18.3101
Ho					-	-	-	-		-	-								-	-	-	-	-	-		-	-	-								-	-	-	-	-				-	-	-	-
Er					2.75729	2.9235	2.94077	2.88553		3.13635	3.05364								1.99038	2.33374	1.18551	0.512916	0.564961	3.64084		2.75739	2.43141	2.85573								5.8051	3.9254	4.29132	3.32226	2.72522				2.69915	1.82327	1.82206	2.32478
Tm					-	-	-	-		-	-								-	-	-	-	-	-		-	-	-								-	-	-	-	-				-	-	-	-
Yb					2.61695	2.8469	2.99347	2.93724		3.26866	2.99722								2.38088	2.83458	1.511	0.888757	0.660764	3.32343		2.6968	2.78423	2.60997								4.95449	3.19553	3.64502	3.00089	2.62392				2.83969	1.97044	1.92101	1.76861
Lu										0.456052	0.400856								0.3241	0.365525	0.167135	0.111179	0.111728	0.492416		0.340464	0.41461	0.403495								0.819504	0.464118	0.5217	0.378352	0.329982				0.393368
Note: Cpx - center of primary clinopyroxene without reaction rim, Cpx1 - center of primary clinopyroxene with reaction rim, Cpx2 - reaction rim of Cpx1, Cpx3 - reaction rim of Opx1; P and T estimations by Putirka-32a and Putirka-32d respectively - single clinopyroxene thermobarometer, Eqs 32a and 32d from Putirka, (2008).
[truncated: 51 more columns]

## Sheet: Cpx - method comparison
Comparison of primary clinopyroxene trace element composition as determined by SIMS and LA-ICP-MS.
Sample	HD38							HD24/2
Method	SIMS				LA-ICP-MS			SIMS			LA-ICP-MS
Point #	Cpx#31	Cpx#32	Cpx#20	Cpx#21	HD38-02	HD38-05	HD38-06	Cpx#1	Cpx#7	Cpx#8	HD24/2-09
Ba	0.475923	0.368959	0.615041	0.192206	0.0579212	0.0694803	0.107195	0.214836	0.44333	0.384048	0.137773
Nb	0.422121	0.355407	0.562705	0.488338	0.266613	0.267455	0.268954	0.485793	0.435929	0.483357	0.372444
La	1.38877	1.47411	1.49827	1.61768	1.3149	1.33078	1.22118	9.96487	10.2281	10.3024	9.24973
Ce	4.61932	4.88189	5.25504	5.47618	4.03218	4.11345	4.14315	19.4732	24.0891	20.2398	19.244
Pr	-	-	0.95955	0.889821	0.719323	0.761855	0.765933	-	-	-	1.92649
Sr	83.4152	82.6456	97.9666	105.092	81.1537	82.9237	81.3412	166.72	181.202	168.272	173.398
Nd	4.69237	5.25609	6.29542	5.82732	4.37779	4.6107	4.47919	6.40024	8.99012	7.33444	7.81248
Sm	2.05829	2.14993	2.57888	2.38288	1.85175	1.84033	1.8995	1.91216	2.10033	1.72234	1.51326
Zr	37.1874	39.5262	40.1229	41.0991	39.7422	40.4559	38.2466	23.0348	22.3124	22.5488	24.1967
Hf	1.30801	1.45184	1.68676	1.55617	1.20747	1.18911	1.19057	0.96375	0.836973	1.16429	0.81683
Eu	0.839989	0.824638	1.13457	0.921504	0.710533	0.756044	0.748215	0.615315	0.779138	0.688684	0.687416
Ti	3566.12	3890.54	4007.36	3932.14	4129.56	4369.26	4182.19	2382.71	2214.13	2408.61	2737.3
Gd	2.59186	2.77393	2.84477	3.6234	2.69803	2.80686	2.76814	2.1622	2.61175	2.63721	2.17142
Tb	-	-	-	-	0.530637	0.518754	0.509443	-	-	-	0.405466
Dy	3.64044	4.03727	4.20548	4.21256	3.58562	3.6645	3.62391	3.05662	2.68835	2.84665	2.94336
Y	21.6742	23.3424	-	-	22.2024	21.9606	22.0899	16.4485	15.9635	16.3908	16.3577
Ho	-	-	-	-	0.791481	0.813552	0.796552	-	-	-	0.633406
Er	2.75729	2.9235	3.13635	3.05364	2.37408	2.35161	2.33691	2.30029	2.01604	1.97507	1.7592
Tm	-	-	-	-	0.321094	0.341556	0.327608	-	-	-	0.246941
Yb	2.61695	2.8469	3.26866	2.99722	2.12515	2.16368	2.13266	2.11428	1.65599	1.81735	1.6118
Lu	-	-	0.456052	0.400856	0.311086	0.321273	0.322121	-	-	-	0.239802

## Sheet: SRM
Trace element composition of reference material.
Sample	BCR-2G*
Method	LA-ICP-MS
Ba	707.643	679.095	714.756	695.618	673.167	692.155	670.575	704.052	665.755	683.536
Nb	12.5372	12.2136	12.3182	12.2944	11.6687	12.0411	11.635	12.1609	11.7129	11.7969
La	26.3891	26.2967	26.461	25.3583	25.0297	25.4091	25.0183	26.4234	25.5046	25.5576
Ce	55.1247	54.4929	55.3968	54.1942	51.4444	52.7882	52.5039	54.368	54.1078	54.0656
Pr	6.70676	6.59126	6.98687	6.76023	6.6315	6.83065	6.47481	6.84843	6.58327	6.67214
Sr	348.04	344.162	358.379	349.631	336.546	341.158	332.591	355.113	340.509	342.348
Nd	29.5606	29.8573	29.9369	34.9014	29.2338	28.8315	28.0061	29.2499	27.8766	28.6127
Sm	7.00648	6.83118	7.10172	6.67266	6.63904	6.72586	6.51648	7.02176	6.80884	6.781
Zr	184.989	187.902	189.008	184.657	186.516	186.148	181.877	191.95	183.311	185.409
Hf	5.27698	5.14383	5.37134	5.05501	5.18487	5.23622	5.08244	5.38351	5.16041	5.13293
Eu	2.05143	1.98885	2.03789	2.05805	1.94838	2.00205	1.90964	2.06807	1.94704	2.00925
Ti	15026.8	14991	14772.8	14803.3	14625.7	14934.6	14604.4	14988.8	14627.7	15147.7
Gd	6.96841	6.95455	6.95367	6.67862	6.67194	6.92553	6.57284	7.04916	6.62852	6.89936
Tb	1.06805	1.06527	1.10597	1.36431	1.03258	1.05666	1.02285	1.10208	1.03457	1.08157
Dy	6.76755	6.80408	6.82903	6.90451	6.78718	6.59359	6.44275	6.84973	6.67075	6.60673
Y	34.8012	35.1624	35.1376	35.04	35.095	35.1777	35.3893	35.5749	35.4144	36.557
Ho	1.33973	1.34796	1.41675	1.34832	1.31132	1.34752	1.2962	1.38082	1.29872	1.36347
Er	3.85981	3.82504	3.94978	3.76857	3.76899	3.85068	3.67824	3.90214	3.7956	3.86389
Tm	0.548686	0.533255	0.563081	0.531533	0.513356	0.530373	0.499704	0.56608	0.51522	0.553025
Yb	3.65989	3.56953	3.73988	3.45748	3.51498	3.63655	3.30994	3.77225	3.48717	3.63074
Lu	0.538774	0.532991	0.553646	0.51687	0.511922	0.53359	0.511905	0.558694	0.524762	0.523925
Note: * - secondary reference material
